# Supplementary material
Source: publisher figshare collection journal article supplement (https://acs.figshare.com/ndownloader/files/9246121)
Supplement: Supplementary file 1 [file 9246121]

## Supporting information

### **Antiorganic Fouling and Low-Protein Adhesion on Reverse-Osmosis Membranes Made of Carbon Nanotubes and Polyamide Nanocomposite**

Yoshihiro Takizawa,<sup>†</sup> Shigeki Inukai,<sup>†</sup> Takumi Araki,<sup>†,§</sup> Rodolfo Cruz-Silva,<sup>†,‡</sup> Noriko Uemura,<sup>§</sup> Aaron Morelos-Gomez,<sup>†</sup> Josue Ortiz-Medina,<sup>†</sup> Syogo Tejima,<sup>†,§</sup> Kenji Takeuchi,<sup>†,‡</sup> Takeyuki Kawaguchi,<sup>†,‡</sup> Toru Noguchi,<sup>†,‡</sup> Takuya Hayashi,<sup>†,‡</sup> Mauricio Terrones,<sup>‡,||</sup> and Morinobu Endo<sup>\*,†,‡</sup>

<sup>†</sup>*Global Aqua Innovation Center, and <sup>‡</sup>Institute of Carbon Science and Technology, Shinshu University, 4-17-1 Wakasato, Nagano 380-8553, Japan*

<sup>§</sup>*Research Organization for Information Science & Technology, 2-32-3, Kitashinagawa, Shinagawa-ku, Tokyo 140-0001, Japan*

<sup>||</sup>*Department of Physics, Department of Materials Science and Engineering, Department of Chemistry, Center for 2-Dimensional and Layered Materials and Center for Atomically Thin Multifunctional Coatings (ATOMIC), The Pennsylvania State University, University Park, Pennsylvania 16802 United States*

Corresponding author's email address: [endo@endomoribu.shinshu-u.ac.jp](mailto:endo@endomoribu.shinshu-u.ac.jp).

Supporting information contains 7 figures

Index:

- Figure S-1.** Representative behavior of the permeate flux, salt rejection and salt permeability of RO membranes during preconditioning (BSA-free and 10 mmol/L-NaCl solution at 0.7 MPa). **(a)** MWCNT-PA nanocomposite membrane and **(b)** laboratory-made plain PA membrane. 3
- Figure S-2.** Snapshots by fluorescence microscopy of the spacer and membrane observed as a function of fouling time under crossflow filtration at 0-144 h on **(a)** CM-A, **(b)** CM-B, **(c)** laboratory-made plain PA membrane and **(d)** MWCNT-PA nanocomposite membrane. 4
- Figure S-3.** **(a)** Fluorescent patterns and **(b)** patterns seen through the transparent spacer. Fluorescent distortions by diffraction due to light passing through the spacer can be seen in the images. 5
- Figure S-4.** Optical (left) and fluorescent (right) images of **(a,b)** the MWCNT-PA nanocomposite membrane and **(c,d)** CM-A observed, respectively. 5
- Figure S-5.** **(a)** Optical microscope image with arrows indicating white lines. **(b)** FM image of the MWCNT-PA nanocomposite membrane with indications that the BSA adhesion formed a line, which is consistent with figure (a). The brightness and contrast were altered to reveal the small degree of fouling. 6
- Figure S-6.** **(a)** MD snapshot of GPA after relaxation. Orange atoms depict the graphene layers and blue atoms represent the PA matrix. **(b)** Charge transfer mapping from PA to graphene sheet. **(c)** MD snapshot of the triple-wall carbon nanotube and PA after relaxation. Orange concentric layers are carbon nanotubes walls and blue atoms represent the PA matrix. **(d)** The charge transfer mapping from PA to carbon nanotube. 6
- Figure S-7.** The calculated model of the surface of **(a)** the GPA and **(b)** plain PA and their corresponding interfacial water layer. The blue spheres correspond to the amide bonds of PA molecules. The surface of the GPA is well-covered by hydrogen-bonded water molecules compared with the plain PA suggesting the interfacial water layer of the GPA can prevent the interaction of amide bonds and the proteins in the water source. 7

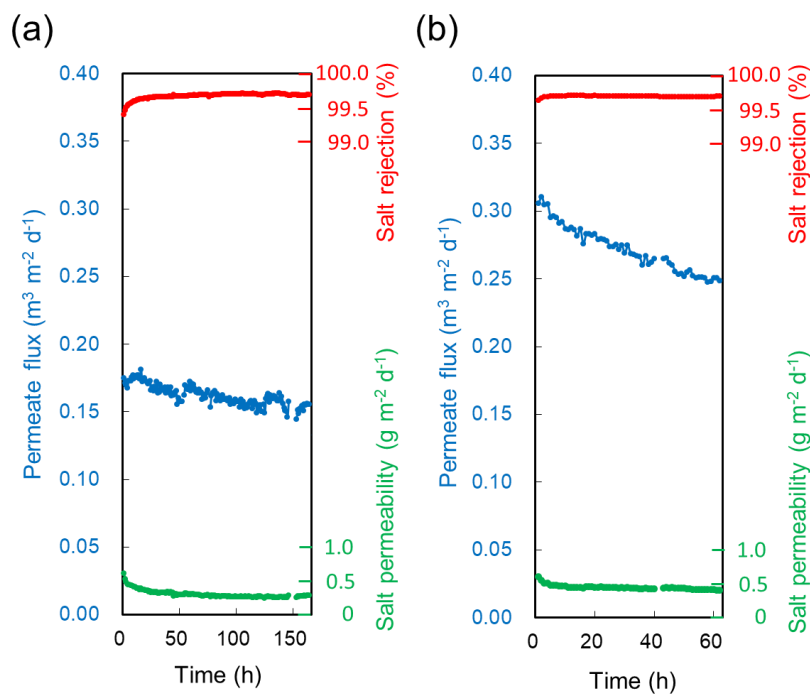

**Figure S-1.** Representative behavior of the permeate flux, salt rejection and salt permeability of RO membranes during preconditioning (BSA-free and 10 mmol/L-NaCl solution at 0.7 MPa). **(a)** MWCNT-PA nanocomposite membrane and **(b)** laboratory-made plain PA membrane.

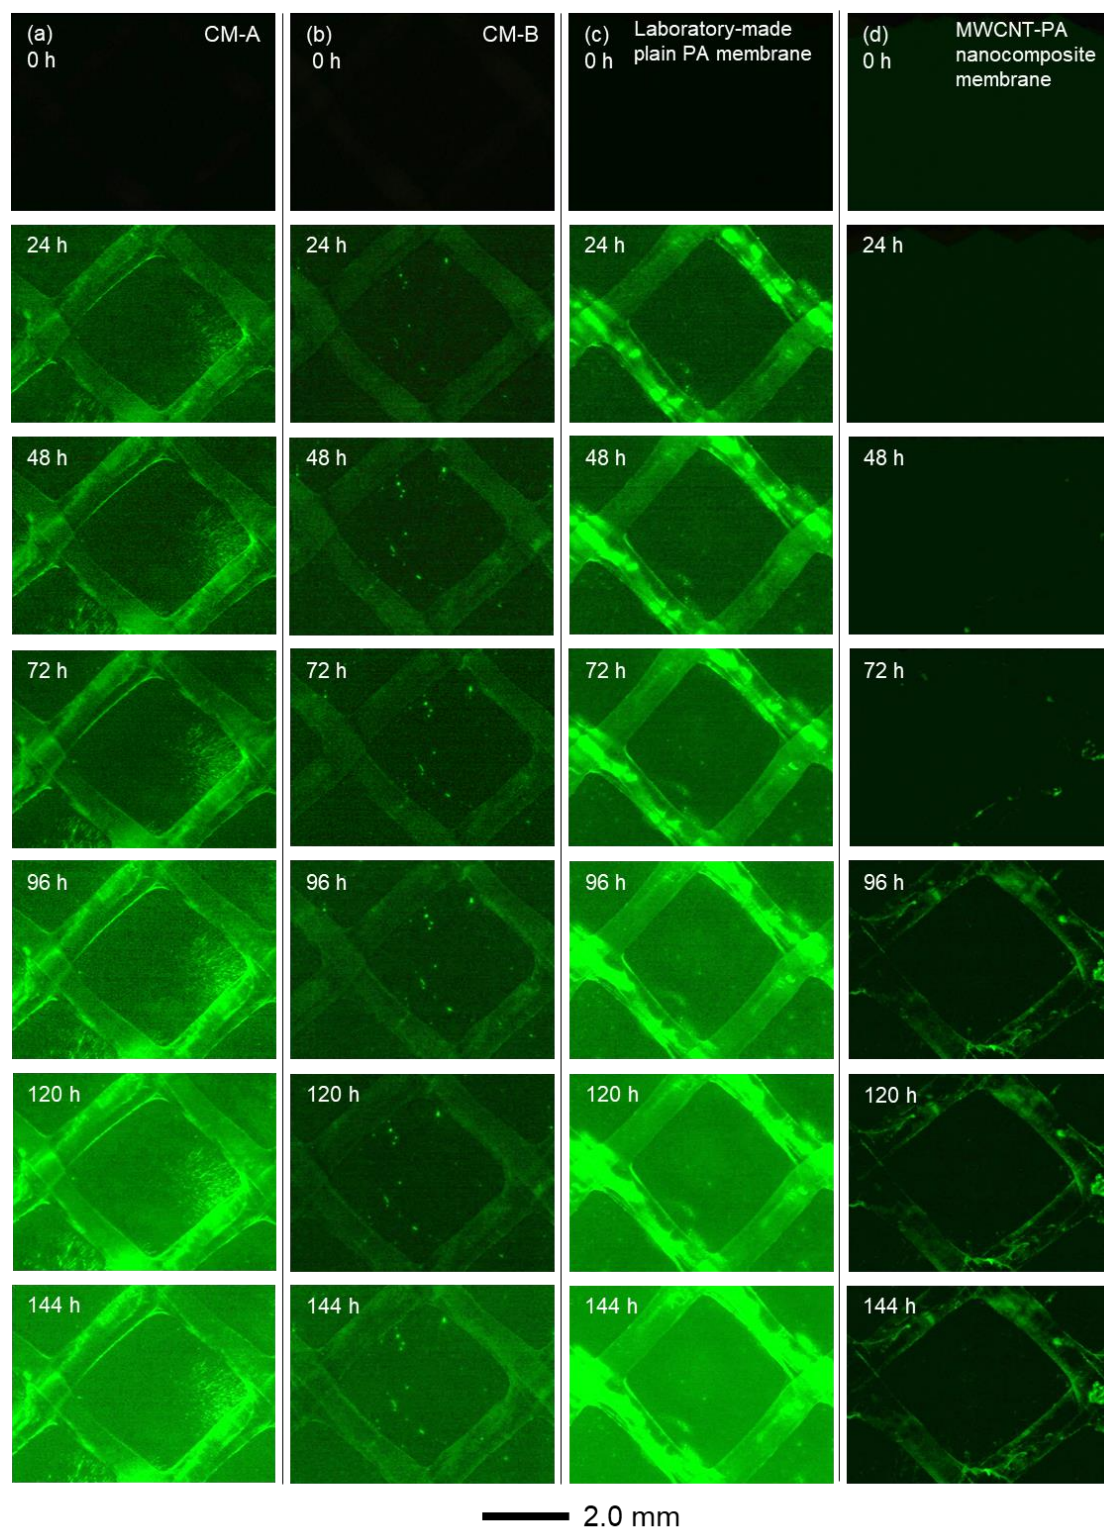

**Figure S-2.** Snapshots by fluorescence microscopy of the spacer and membrane observed as a function of fouling time under crossflow filtration at 0-144 h on (a) CM-A, (b) CM-B, (c) laboratory-made plain PA membrane and (d) MWCNT-PA nanocomposite membrane.

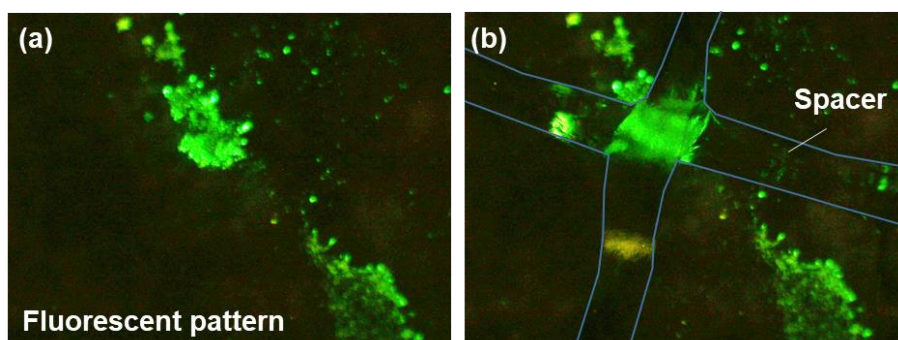

**Figure S-3.** (a) Fluorescent patterns and (b) patterns seen through the transparent spacer. Fluorescent distortions by diffraction due to light passing through the spacer can be seen in the images.

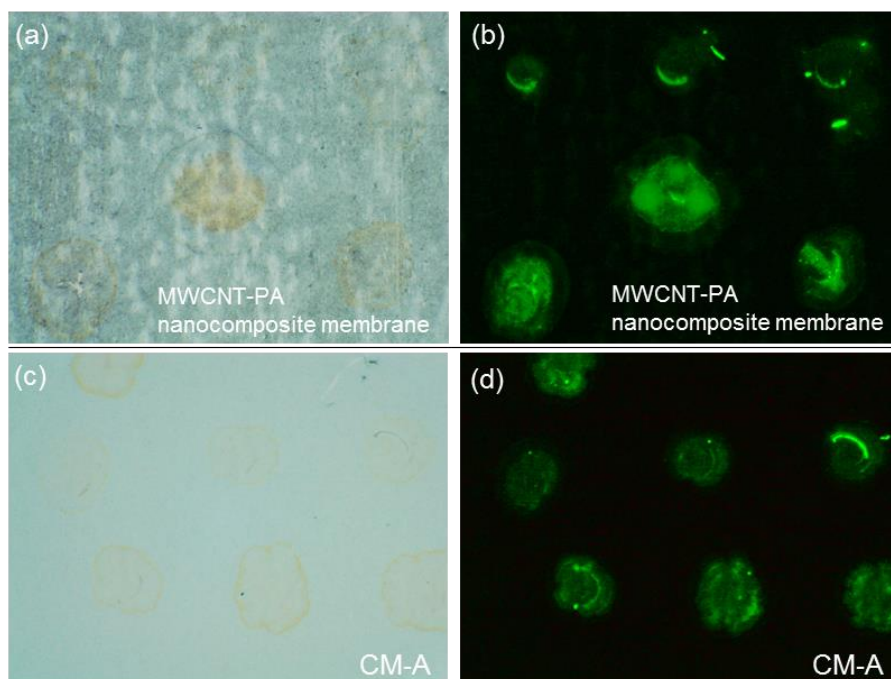

**Figure S-4.** Optical (left) and fluorescent (right) images of (a,b) the MWCNT-PA nanocomposite membrane and (c,d) CM-A observed, respectively.



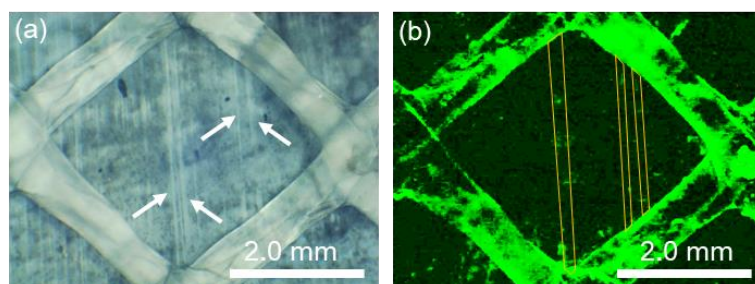

**Figure S-5.** (a) Optical microscope image with arrows indicating white lines. (b) FM image of the MWCNT-PA nanocomposite membrane with indications that the BSA adhesion formed a line, which is consistent with figure (a). The brightness and contrast were altered to reveal the small degree of fouling.

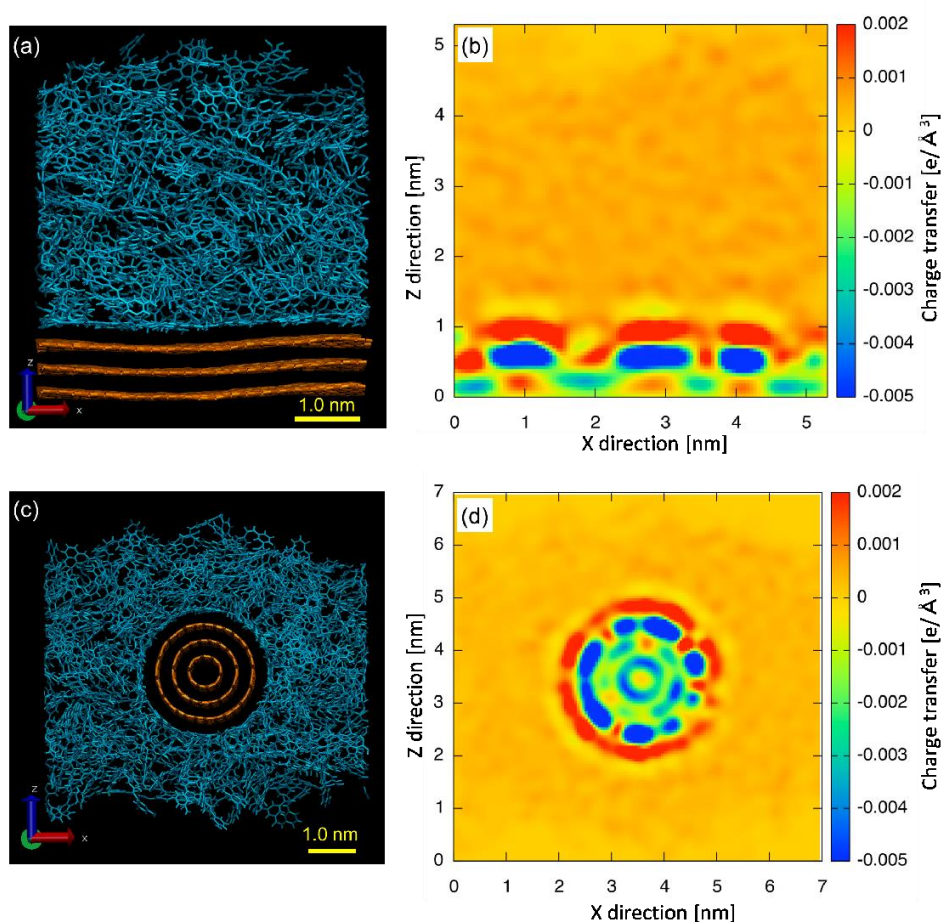

**Figure S-6.** (a) MD snapshot of GPA after relaxation. Orange atoms depict the graphene layers and blue atoms represent the PA matrix. (b) Charge transfer mapping from PA to graphene sheet. (c) MD snapshot of the triple-wall carbon nanotube and PA after relaxation. Orange concentric layers are carbon nanotubes walls and blue atoms represent the PA matrix. (d) The charge transfer mapping from PA to carbon nanotube.

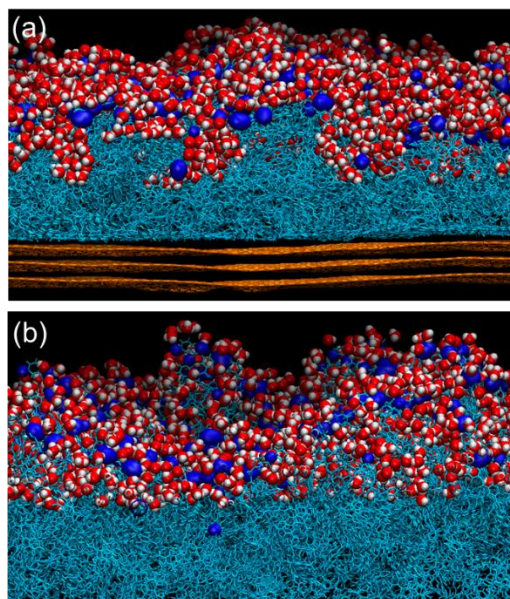

**Figure S-7.** The calculated model of the surface of (a) the GPA and (b) plain PA and their corresponding interfacial water layer. The blue spheres correspond to the amide bonds of PA molecules. The surface of the GPA is well-covered by hydrogen-bonded water molecules compared with the plain PA suggesting the interfacial water layer of the GPA can prevent the interaction of amide bonds and the proteins in the water source.
